# Supplementary material for: Studies in the mouse model identify strain variability as a major determinant of disease outcome in Leishmania infantum infection
Source: PubMed Central journal article supplement (PMC4684599; doi:10.1186/s13071-015-1259-6), 2015-12-18
Supplement: 13071_2015_1259_MOESM1_ESM.pdf [file 13071_2015_1259_MOESM1_ESM.pdf]

**Table S1. Primers used to amplify mouse genes.**

| <b>Gene</b>     | <b>Forward Primer</b>  | <b>Reverse Primer</b>   |
|-----------------|------------------------|-------------------------|
| <i>Il-12p40</i> | CCTGAAGTGTGAAGCACCAA   | AGTCCCTTTGGTCCAGTGTG    |
| <i>Il-10</i>    | CTGCTATGCTGCCTGCTCTTA  | GGATCATTTCGATAAAGGCTTG  |
| <i>Tnf</i>      | CCGTCAGCCGATTTGCTATCT  | CGGACTCCGCAAAGTCTAAG    |
| <i>Ifng</i>     | GAACTGGCAAAAGGATGGTGAC | GACCTGTGGGTTGTTGACCT    |
| <i>Nos2</i>     | ACATCGACCCGTCCACAGTAT  | CAGAGGGGTAGGCTTGTCTC    |
| <i>Arg1</i>     | CTCCAAGCCAAAGTCCTTAGAG | GGAGCTGTCATTAGGGACATCA  |
| <i>Hprt</i>     | GGTGGAGATGATCTCTCAAC   | TCATTATAGTCAAGGGCATATCC |
